# Supplementary material for: Investigating the role of phonons in the phase stability of uranium-based Laves phases
Source: Royal Society of Chemistry journal article supplement (doi:10.1039/d3ra00498h), 2023-01-01
Supplement: d3ra00498h1.pdf [file d3ra00498h1.pdf]

### Supporting Information:

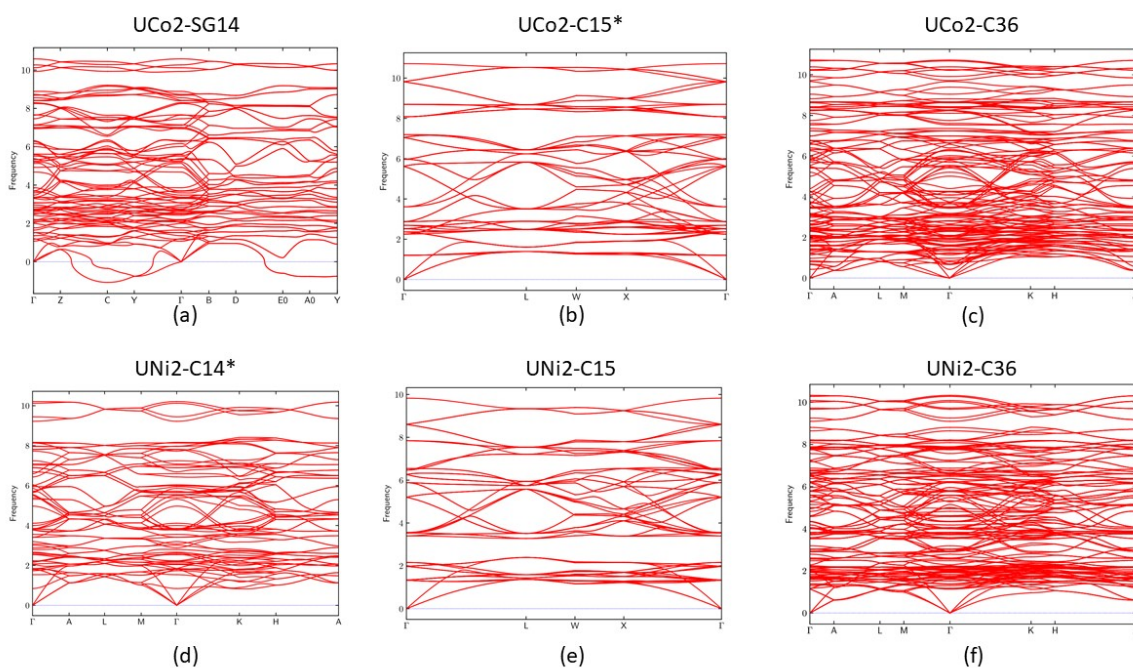

Supporting Fig. 1. Phonon band structures for all relaxed phases in THz. Note the extremely flat phonon modes in the C15 structures near 1 THz.

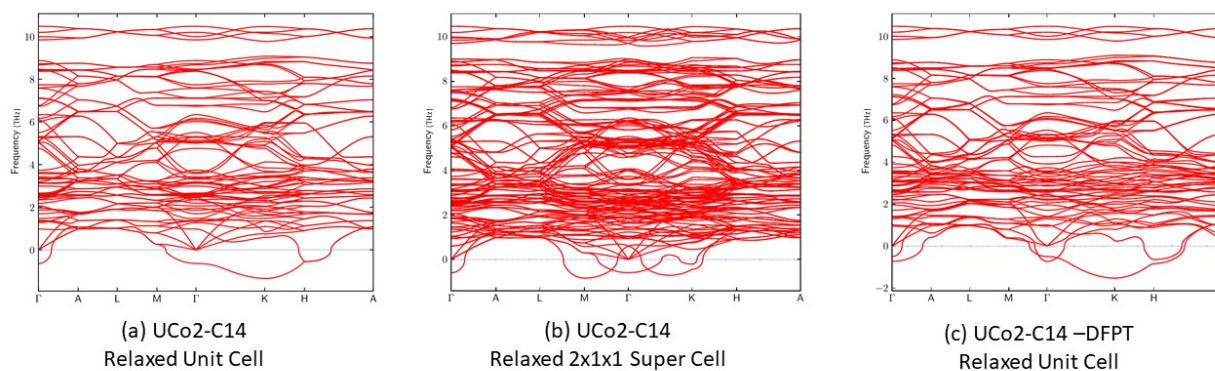

Supporting Fig. 2. Phonon band structures for relaxed UCo<sub>2</sub>-C14 (SG176) calculated with different methods: (a) finite displacement method of the the relaxed unit cell, (b) finite displacement method on a relaxed  $2 \times 1 \times 1$  orthorhombic super cell, and (c) density functional perturbation theory on a relaxed unit cell. All of the methods predict an unstable phonon mode at the gamma point with an imaginary vibrational frequency.

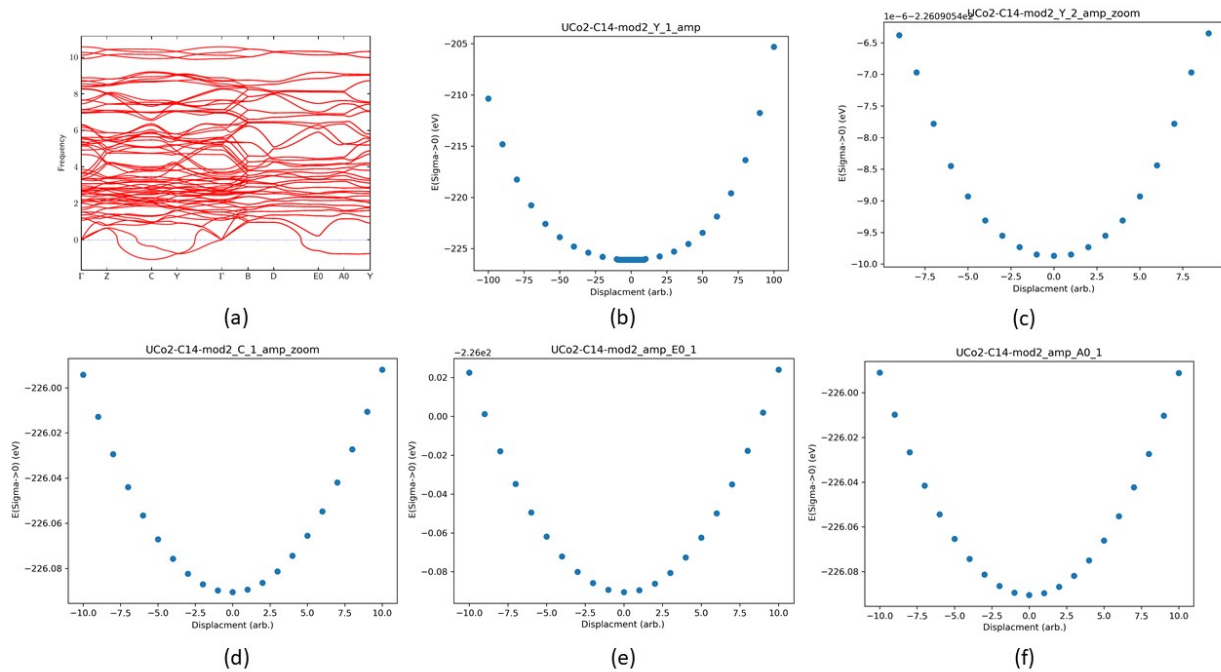

Supporting Fig. 3: (a) the phonon band structure of relaxed UC02-SG14. (b-c) the energy surface associated with displacement of the atoms according to the vibrational eigenvectors at special k-points. Note that all of the energy surfaces are concave and do not indicate an obvious method of distortion to remove the unstable modes. It is possible the imaginary frequencies are computational artifacts.
